# Supplementary material for: Click-chemistry approach for graphene modification: effective reinforcement of UV-curable functionalized graphene/polyurethane acrylate nanocomposites
Source: Royal Society of Chemistry journal article supplement (doi:10.1039/c4ra15394d), 2015-01-01
Supplement: c4ra15394d1.pdf [file c4ra15394d1.pdf]

## **Supplementary information**

Click-chemistry approach for graphene modification: effective  
reinforcements of UV-curable functionalized graphene/polyurethane  
acrylate nanocomposites

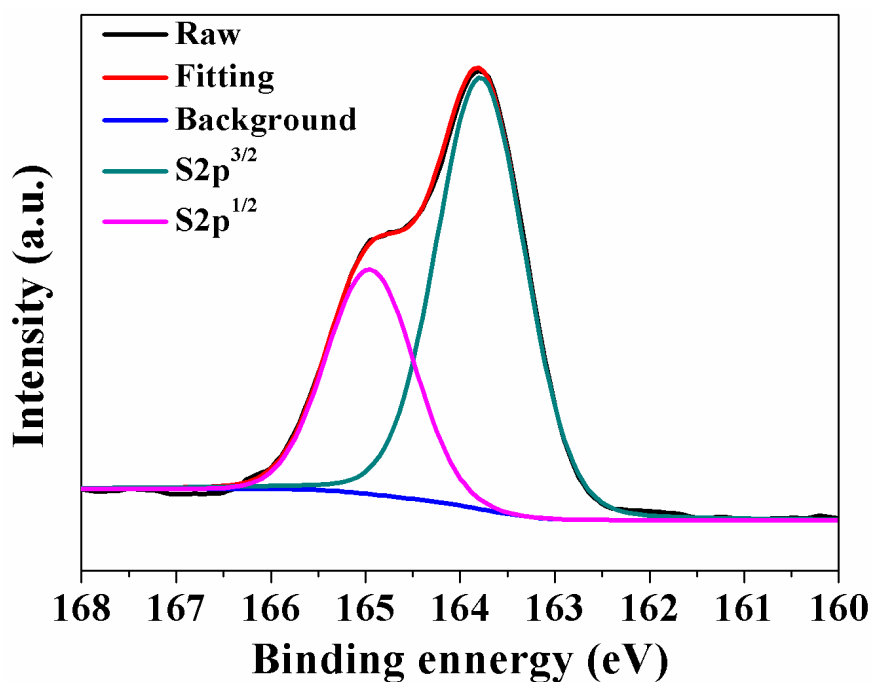

**Fig. S1.** XPS S2p spectra of FRGO

The XPS S2p spectrum of FRGO is fitted with a doublet having a 2:1 area ratio, and a 1.2 eV splitting, as shown in Fig. S1. The doublet at a binding energy of 163.8 and 165.0 eV, corresponding to S2p<sup>3/2</sup> and S2p<sup>1/2</sup> peaks, respectively, which is attributed to S-C bonds and/or free thiol (-SH).<sup>1, 2</sup> This result reveals the grafting of OMP-POSS on the surface of RGO.

#### References

1. S. Watcharinyanon, C. Puglia, E. Göthelid, J.-E. Bäckvall, E. Moons and L. S. Johansson, *Surf. Sci.*, 2009, **603**, 1026-1033.
2. D. G. Castner, K. Hinds and D. W. Grainger, *Langmuir*, 1996, **12**, 5083-5086.
